# Supplementary material for: An enhancement of binary particle swarm optimization for gene selection in classifying cancer classes
Source: Springer Nature journal article supplement (doi:10.1186/1748-7188-8-15), 2013-04-24
Supplement: 13015_2012_197_MOESM1_ESM.pdf [file 13015_2012_197_MOESM1_ESM.pdf]

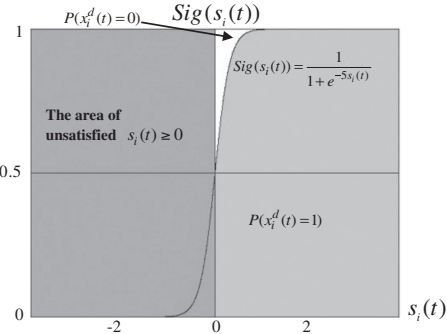

**(a)** The Probability area for EPSO

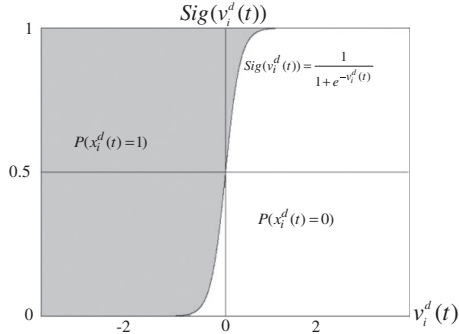

**(b)** The Probability area for BPSO

**Legends:**

- The area of unsatisfied  $s_i(t) \geq 0$ .
- The area of  $P(x_i^d(t) = 0)$ .
- The area of  $P(x_i^d(t) = 1)$ .
