# Supplementary material for: An enhancement of binary particle swarm optimization for gene selection in classifying cancer classes
Source: Springer Nature journal article supplement (doi:10.1186/1748-7188-8-15), 2013-04-24

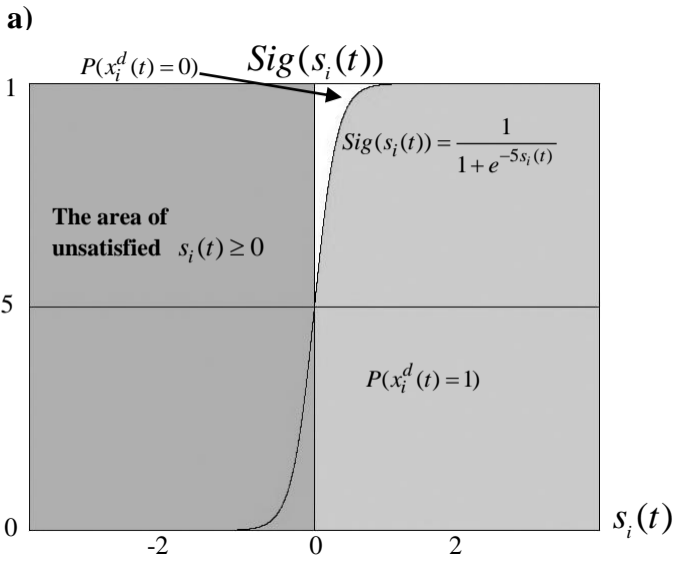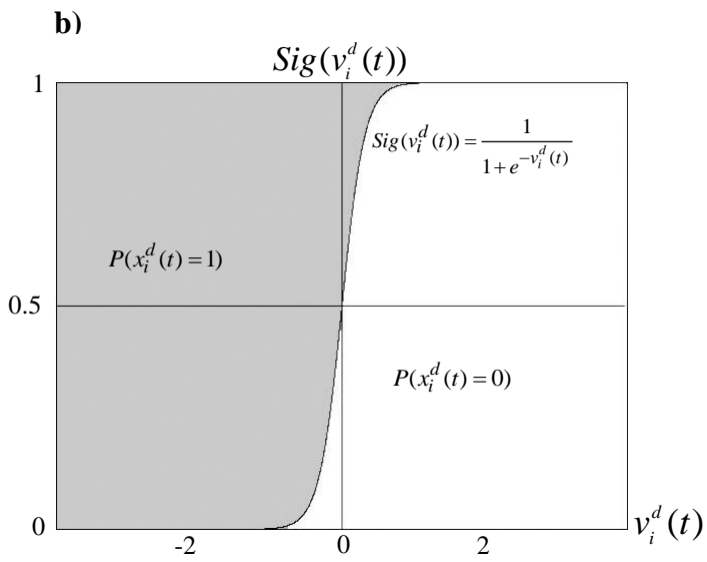

Supplement: 13015_2012_197_MOESM3_ESM.pdf [file 13015_2012_197_MOESM3_ESM.pdf]
